# Supplementary material
Source: PubMed Central journal article supplement (PMC7691140)
Supplement: mmc1.pdf [file mmc1.pdf]

**Supplemental Table. Cardiovascular risk factors for arterial thrombotic events in COVID-19+ and COVID19- patients**

|                                    | COVID19+ AT+<br>n=30  | COVID19- AT+<br>n=160 | <i>P</i> |
|------------------------------------|-----------------------|-----------------------|----------|
| Age, mean [IQR]                    | 70.7 [57,79.5]        | 67.9 [57.5,75]        | .88      |
| Sex Male, n (%)                    | 24 (80)               | 115 (71.9)            | .36      |
| Cardiovascular risk factors, n (%) |                       |                       |          |
| High blood pressure                | 18 (60)               | 90 (56.2)             | >.99     |
| Smoking                            | 13 (43.3)             | 86 (53.7)             | .29      |
| Diabete                            | 9 (30)                | 54 (33.7)             | .70      |
| Dyslipidemia                       | 13 (43.3)             | 87 (54.4)             | .69      |
| Past CVE                           | 14 (46.7)             | 57 (35.6)             | .25      |
| BMI>25                             | 14 (46.7)             | 65 (40.6)             | .54      |
| BMI, mg/m <sup>2</sup> [IQR]       | 25.2 [23.6,28.4]      | 25.9 [22.8-,9.5]      | .90      |
| Atrial Fibrillation, n (%)         | 4 (13.3)              | 12 (7.5)              | .29      |
| Treatment at admission, n (%)      |                       |                       |          |
| Antiplatelet treatment             | 12 (40)               | 93 (58.1)             | .07      |
| Statin                             | 12 (40)               | 70 (43.7)             | .70      |
| ACE inhibitors or ARB              | 13 (43.3)             | 69 (43.1)             | >.99     |
| Arterial thrombosis, n (%)         |                       |                       |          |
| Myocardial Infarction              | 9 (30)                | 93 (58.1)             | .005     |
| Stroke                             | 8 (26.7)              | 35 (21.9)             | .56      |
| Acute/Subacute limb ischaemia      | 6 (20)                | 30 (18.7)             | .87      |
| Atypical arterial thrombosis       | 7 <sup>a</sup> (23.3) | 2 <sup>b</sup> (1.2)  | <.001    |
| In-hospital death, n (%)           | 12 (40)               | 5 (3.1)               | <.001    |

ACE, angiotensin-converting-enzyme; ARB, angiotensin receptor blocker; AT, arterial thrombotic event; BMI, body mass index; CVE, cardiovascular event; COVID-19, coronavirus disease 2019; IQR, interquartile range

a, including acute ischemic colitis (n=1), splenic infarct (n=1), massive aortic thrombosis (n=2), renal artery thrombosis (n=1), diffuse cerebral microvasculopathy (n=1) and upper extremity arterial thrombosis (n=1)

b, including acute ischemic colitis (n=2)

**Supplemental Figure 1. Flow Chart**

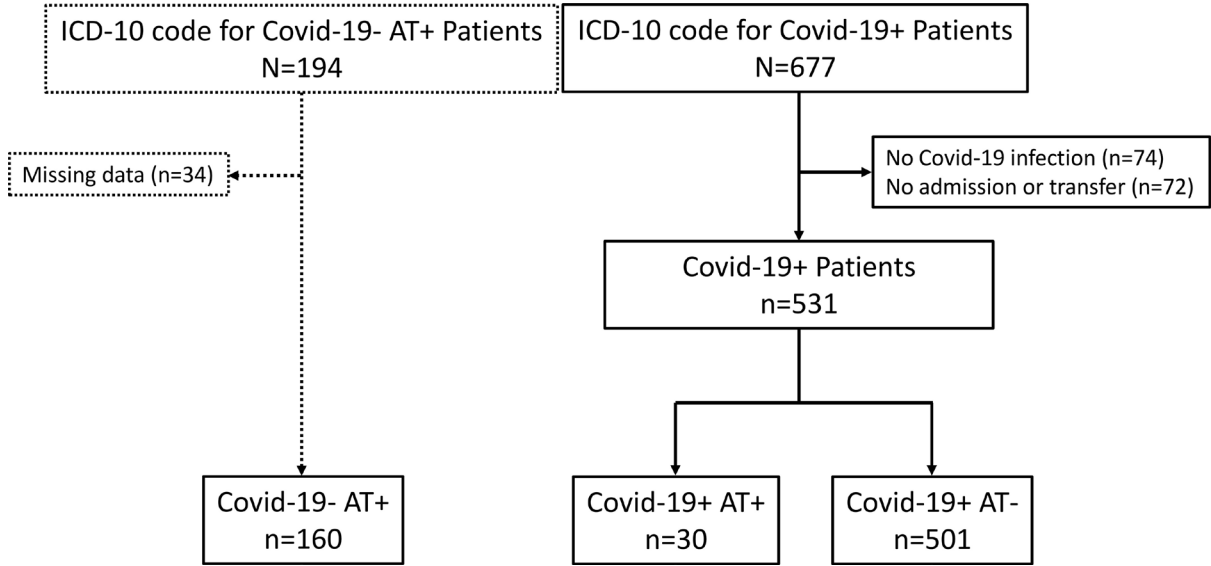

AT, arterial thrombotic event; COVID-19, coronavirus disease 2019; ICD, international classification of diseases

**Supplemental Figure 2. Receiver operating characteristics (ROC) curve of D-dimer for prediction of arterial thrombotic events in COVID-19+ patients.**

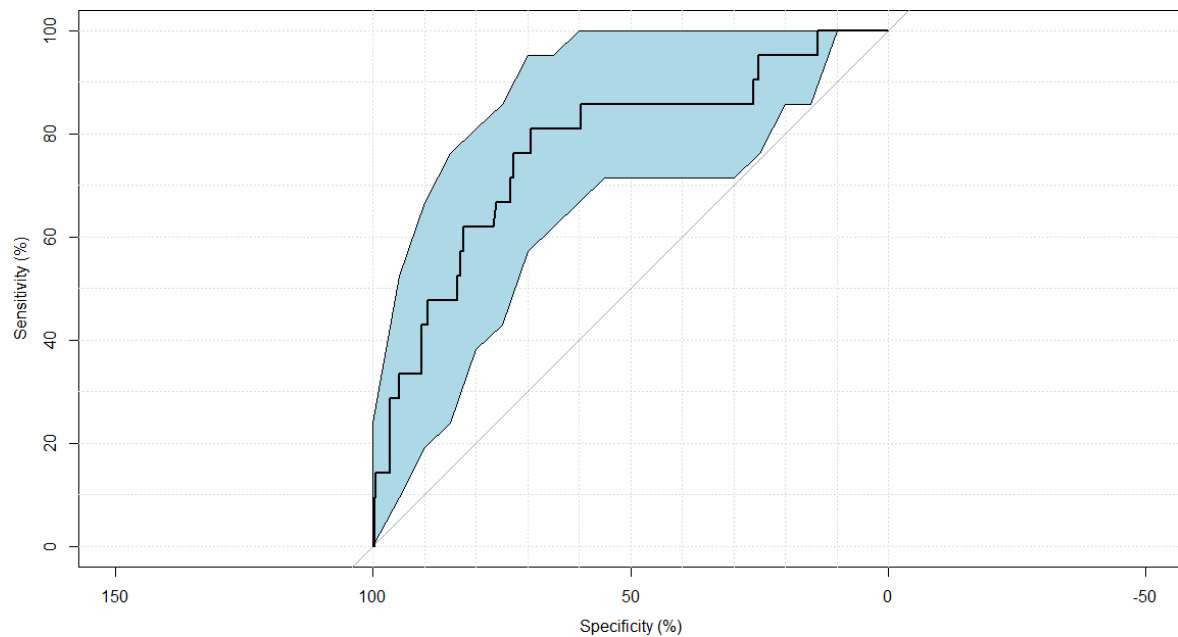

The corresponding receiver operating characteristics curve showed that D-dimer level was predictive for arterial thrombotic events (AT) in COVID-19+ patients (area under the curve 0.77, 95% CI 0.66–0.88;  $P < .001$ ).

A plasma D-dimer level of 1267 ng/mL (cut off value corresponding to the upper left corner of the ROC curve) had a sensitivity of 76.2% (95% CI 54.9–89.4%) and a specificity of 72.7% (95% CI 67.7–77.2%) for AT.
